# Supplementary material for: Correlations between Molecular Alterations, Histopathological Characteristics, and Poor Prognosis in Esophageal Adenocarcinoma
Source: MDPI journal article supplement (doi:10.3390/cancers15051408), 2023-02-23
Supplement: s1 [file s1]

Supplementary Table S1: *TP53* variant classification according to TP53 database.

| TP53 variant                        | Domain function     | Residue function        | Effect   | Damaging  |
|-------------------------------------|---------------------|-------------------------|----------|-----------|
| Chr17: 7577104-A-AGGACAGGCACAAACAC  | DNA binding         | Buried                  | NA       | NA        |
| Chr17: 7578176-C-A   COSM118939     | NA                  | NA                      | splice   | NA        |
| Chr17: 7578271-T-A   rs786201838    | DNA binding         | Buried                  | missense | Damaging  |
| Chr17: 7577539-G-A   rs121912651    | DNA binding         | DNA binding             | missense | Damaging  |
| Chr17: 7577082-C-A   COSM10726      | DNA binding         | Partially exposed       | nonsense | NA        |
| Chr17: 7577548-C-T   rs28934575     | DNA binding         | Buried                  | missense | Damaging  |
| Chr17: 7577114-C-T   rs863224451    | DNA binding         | DNA binding             | missense | Damaging  |
| Chr17: 7579314-TGCAAGTCACA-T        | DNA binding         | Buried                  | NA       | NA        |
| Chr17: 7577586-A-C   COSM10715      | DNA binding         | Buried                  | missense | Damaging  |
| Chr17: 7578370-C-A   COSM131534     | NA                  | NA                      | splice   | NA        |
| Chr17: 7577580-T-C   rs587780073    | DNA binding         | Buried                  | missense | Damaging  |
| Chr17: 7578419-C-A   COSM10996      | DNA binding         | Partially exposed       | nonsense | NA        |
| Chr17: 7578212-G-A   rs397516436    | DNA binding         | Buried                  | nonsense | NA        |
| Chr17: 7579346-AAGAAGCCC-A          | DNA binding         | NA                      | NA       | NA        |
| Chr17: 7578509-A-G   rs1057519978   | DNA binding         | glutathionylation sit   | missense | Damaging  |
| Chr17: 7578272-G-A   rs876658468    | DNA binding         | Buried                  | missense | Damaging  |
| Chr17: 7577094-G-A   rs28934574     | DNA binding         | Buried                  | missense | Damaging  |
| Chr17: 7578380-C-CT                 | DNA binding         | Exposed                 | missense | Damaging  |
| Chr17: 7579326-A-ACTTGGCTG          | DNA binding         | DNA binding             | NA       | NA        |
| Chr17: 7579506-C-CTGGACCTGGCTCTTCAG | SH3-like/Pro-rich   | NA                      | NA       | NA        |
| Chr17: 7577094-G-A   rs28934574     | DNA binding         | Buried                  | missense | Damaging  |
| Chr17: 7577539-G-A   rs121912651    | DNA binding         | DNA binding             | missense | Damaging  |
| Chr17: 7578463-G-C                  | DNA binding         | Partially exposed       | missense | Tolerated |
| Chr17: 7577539-G-A   rs121912651    | DNA binding         | DNA binding             | missense | Damaging  |
| Chr17: 7578196-A-C   COSM44198      | DNA binding         | Buried                  | missense | Damaging  |
| Chr17: 7577539-G-A   rs121912651    | DNA binding         | DNA binding             | missense | Damaging  |
| Chr17: 7577094-G-A   rs28934574     | DNA binding         | Buried                  | missense | Damaging  |
| Chr17: 7578525-G-C   rs1057519976   | DNA binding         | Buried                  | missense | Damaging  |
| Chr17: 7577117-A-G   COSM131453     | DNA binding         | Buried                  | missense | Damaging  |
| Chr17: 7577550-C-T   rs1057517983   | DNA binding         | Exposed                 | missense | Damaging  |
| Chr17: 7578271-T-C   rs786201838    | DNA binding         | Buried                  | missense | Damaging  |
| Chr17: 7578269-G-A   rs587780071    | DNA binding         | Buried                  | missense | Damaging  |
| Chr17: 7577105-G-A   rs876659802    | DNA binding         | Buried                  | missense | Damaging  |
| Chr17: 7579722-C-T                  | NA                  | NA                      | splice   | NA        |
| Chr17: 7578452-G-C   rs863224683    | DNA binding         | Partially exposed       | missense | Damaging  |
| Chr17: 7579312-C-A   rs55863639     | DNA binding         | Buried                  | splice   | Tolerated |
| Chr17: 7577106-G-A   COSM10814      | DNA binding         | Buried                  | missense | Damaging  |
| Chr17: 7577120-C-T   rs28934576     | DNA binding         | DNA binding             | missense | Damaging  |
| Chr17: 7579374-C-A                  | DNA binding         | Buried                  | missense | Damaging  |
| Chr17: 7577538-C-T   rs11540652     | DNA binding         | DNA binding             | missense | Damaging  |
| Chr17: 7579368-A-C   COSM20765      | DNA binding         | NA                      | missense | Damaging  |
| Chr17: 7577547-C-T   rs121912656    | DNA binding         | Buried                  | missense | Damaging  |
| Chr17: 7578524-G-C   COSM11166      | DNA binding         | Buried                  | missense | Damaging  |
| Chr17: 7578475-G-A   rs587782705    | DNA binding         | Partially exposed       | missense | Damaging  |
| Chr17: 7578212-G-A   rs397516436    | DNA binding         | Buried                  | nonsense | NA        |
| Chr17: 7577120-C-T   rs28934576     | DNA binding         | DNA binding             | missense | Damaging  |
| Chr17: 7578197-C-CCACCA             | DNA binding         | Buried                  | FS       | NA        |
| Chr17: 7578265-A-G   rs760043106    | DNA binding         | Buried                  | missense | Damaging  |
| Chr17: 7578555-C-T   rs868137297    | NA                  | NA                      | splice   | NA        |
| Chr17: 7574003-G-A   rs730882029    | tetramerisation/NET | NA                      | nonsense | NA        |
| Chr17: 7577156-C-T   COSM127199     | NA                  | NA                      | splice   | NA        |
| Chr17: 7578406-C-T   rs28934578     | DNA binding         | Buried                  | missense | Damaging  |
| Chr17: 7579329-T-C   rs121912658    | DNA binding         | Ublation/Ubiquitination | missense | Damaging  |
| Chr17: 7578403-C-A   COSM10645      | DNA binding         | Zn binding              | missense | Damaging  |
| Chr17: 7577106-G-T   COSM10814      | DNA binding         | Buried                  | missense | Damaging  |
| Chr17: 7577081-T-A   rs1057519985   | DNA binding         | Partially exposed       | missense | Damaging  |
| Chr17: 7577538-C-T   rs11540652     | DNA binding         | DNA binding             | missense | Damaging  |
| Chr17: 7577539-G-A   rs121912651    | DNA binding         | DNA binding             | missense | Damaging  |
| Chr17: 7578475-G-A   rs587782705    | DNA binding         | Partially exposed       | missense | Damaging  |
| Chr17: 7577121-G-A   rs121913343    | DNA binding         | DNA binding             | missense | Damaging  |
| Chr17: 7578460-A-C   COSM1480073    | DNA binding         | Buried                  | missense | Damaging  |
| Chr17: 7578550-G-T   COSM1637542    | DNA binding         | Buried                  | missense | Damaging  |
| Chr17: 7577538-C-T   rs11540652     | DNA binding         | DNA binding             | missense | Damaging  |
| Chr17: 7578406-C-T   rs28934578     | DNA binding         | Buried                  | missense | Damaging  |
| Chr17: 7577121-G-A   rs121913343    | DNA binding         | DNA binding             | missense | Damaging  |
| Chr17: 7577574-T-C   COSM10731      | DNA binding         | Buried                  | missense | Damaging  |
| Chr17: 7578452-TG-T   COSM44130     | DNA binding         | Buried                  | FS       | NA        |
| Chr17: 7578406-C-T   rs28934578     | DNA binding         | Buried                  | missense | Damaging  |
| Chr17: 7577538-C-T   rs11540652     | DNA binding         | DNA binding             | missense | Damaging  |
| Chr17: 7578431-G-A   COSM11333      | DNA binding         | Exposed                 | nonsense | NA        |
| Chr17: 7577538-C-T   rs11540652     | DNA binding         | DNA binding             | missense | Damaging  |
| Chr17: 7578406-C-T   rs28934578     | DNA binding         | Buried                  | missense | Damaging  |
| Chr17: 7578256-TC-T   COSM118010    | DNA binding         | Partially exposed       | FS       | NA        |
| Chr17: 7578291-T-C   COSM1679503    | NA                  | NA                      | splice   | NA        |
| Chr17: 7577550-C-T   rs1057517983   | DNA binding         | Exposed                 | missense | Damaging  |
| Chr17: 7578394-T-C   rs1057519991   | DNA binding         | Zn binding              | missense | Damaging  |
| Chr17: 7579311-C-A   COSM127204     | NA                  | NA                      | splice   | NA        |
| Chr17: 7578406-C-T   rs28934578     | DNA binding         | Buried                  | missense | Damaging  |
| Chr17: 7577094-G-A   rs28934574     | DNA binding         | Buried                  | missense | Damaging  |
| Chr17: 7577538-C-T   rs11540652     | DNA binding         | DNA binding             | missense | Damaging  |
| Chr17: 7577141-C-A   rs193920774    | DNA binding         | Buried                  | missense | Damaging  |
| Chr17: 7578403-C-A   COSM10645      | DNA binding         | Zn binding              | missense | Damaging  |
| Chr17: 7577097-C-T   rs764146326    | DNA binding         | Buried                  | missense | Damaging  |
| Chr17: 7578437-G-A                  | DNA binding         | Partially exposed       | nonsense | NA        |
| Chr17: 7578406-C-T   rs28934578     | DNA binding         | Buried                  | missense | Damaging  |
| Chr17: 7577121-G-A   rs121913343    | DNA binding         | DNA binding             | missense | Damaging  |
| Chr17: 7578534-C-A   rs866775781    | DNA binding         | Ubiquitination site     | missense | Damaging  |
| Chr17: 7578280-G-A   COSM100027     | DNA binding         | Partially exposed       | missense | Damaging  |
| Chr17: 7578479-G-C   COSM10905      | DNA binding         | Buried                  | missense | Damaging  |
| Chr17: 7577599-CAG-C   COSM46164    | DNA binding         | Exposed                 | FS       | NA        |
| Chr17: 7577511-A-AGT                | DNA binding         | Buried                  | NA       | NA        |
| Chr17: 7577517-A-T   rs876659675    | DNA binding         | ADP-ribosylation site   | missense | Damaging  |
| Chr17: 7578263-G-A   rs397516435    | DNA binding         | Buried                  | nonsense | NA        |
| Chr17: 7577539-G-A   rs121912651    | DNA binding         | DNA binding             | missense | Damaging  |
| Chr17: 7578212-GA-A   rs864309495   | DNA binding         | Buried                  | FS       | NA        |
| Chr17: 7578433-G-C   COSM11508      | DNA binding         | Exposed                 | nonsense | NA        |
| Chr17: 7577539-G-A   rs121912651    | DNA binding         | DNA binding             | missense | Damaging  |
| Chr17: 7579532-T-TG                 | Transactivation TAD | NA                      | NA       | NA        |
| Chr17: 7578202-A-C   COSM119678     | DNA binding         | Buried                  | missense | Damaging  |
| Chr17: 7579591-C-T   COSM1610880    | NA                  | NA                      | splice   | NA        |
| Chr17: 7578211-C-T   rs587778720    | DNA binding         | Buried                  | missense | Damaging  |
| Chr17: 7578508-C-T   rs587781288    | DNA binding         | glutathionylation sit   | missense | Damaging  |
| Chr17: 7578406-C-T   rs28934578     | DNA binding         | Buried                  | missense | Damaging  |
| Chr17: 7579470-CG-C   COSM1268331   | SH3-like/Pro-rich   | NA                      | FS       | NA        |
| Chr17: 7577538-C-T   rs11540652     | DNA binding         | DNA binding             | missense | Damaging  |
| Chr17: 7579532-T-TG                 | Transactivation TAD | NA                      | NA       | NA        |
| Chr17: 7579349-A-C   COSM10717      | DNA binding         | Buried                  | missense | Damaging  |
| Chr17: 7578217-G-A   COSM1386676    | DNA binding         | Phosphorylation site    | missense | Damaging  |
| Chr17: 7578526-C-A   COSM10647      | DNA binding         | Buried                  | missense | Damaging  |
| Chr17: 7578290-C-G   COSM127200     | NA                  | NA                      | splice   | NA        |

Supplementary Table S2: Degree of staining for HNF1alpha and % of variant alleles in tumors.

IHC: 1+ weak positive staining, 2+ strong positive staining. Results in each column are reported as % of positive cells. Sample EAC\_15 was used as positive. Control for staining, as it did not carry any *HNF1alpha* variants.

| EAC ID | HNF1alpha variations            | HNF1A reads                  | gnomAD or COSMIC database | Other genes mutated                               | HNF1A-IHC 1+ % | HNF1A-IHC 2+ % | pT | pN |
|--------|---------------------------------|------------------------------|---------------------------|---------------------------------------------------|----------------|----------------|----|----|
| 150    | p.Gly292ArgfsTer25              | 12/122 (9.836%)              | rs751449138               | none                                              | 50             | 50             | 3  | 1  |
| 191    | p.Pro337Leu                     | 896/1163 (77.04%)            | rs56031130                | ATM, TP53,                                        | 30             | 0              | 3  | 3  |
| 192    | p.Ala161Thr                     | 778/1703 (46%)               | rs201095611               | PIK3CA                                            | 2              | 0              | 2  | 1  |
| 203    | p.Ala161Thr                     | 587/1344 (44%)               | rs201095611               | TP53, PIK3CA                                      | 15             | 0              | 3  | 2  |
| 204    | p.Pro141Ser / p.Pro379LeufsTer5 | 57/374 (15%) / 114/401 (28%) | rs150513055 / COSM2175480 | SMAD4, IDH2, RET, CTNNB1, FLT3, MET, MSH6, PIK3CA | 80             | 0              | 2  | 1  |
| 226    | p.Arg168His                     | 957/1208 (79%)               | rs377110124               | ATM, ERBB2, CTNNB1                                | 2              | 0              | 3  | 3  |
| 233    | p.His505Asn                     | 518/767 (68%)                | rs577078110               | EGFR                                              | 10             | 0              | 4  | 3  |
| 15     | wt                              |                              |                           |                                                   | 50             | 0              | 2  | 1  |

Supplementary Table S3: Correlation analyses for the different gene mutations found in 164 EAC cases.

| Gene 1  | Gene 2  | Pearson Correlation Coefficient | p-value |
|---------|---------|---------------------------------|---------|
| TP53    | ATM     | -0.147                          | 0.047   |
| TP53    | HNF1A   | -0.166                          | 0.031   |
| TP53    | MET     | -0.195                          | 0.011   |
| MSH6    | PIK3CA  | 0.152                           | 0.048   |
| ERBB2   | KRAS    | 0.153                           | 0.047   |
| CTNNB1  | IDH2    | 0.155                           | 0.044   |
| MET     | IDH2    | 0.155                           | 0.044   |
| SMARCA4 | ERBB2   | 0.155                           | 0.044   |
| MAP2K1  | PIK3CA  | 0.158                           | 0.040   |
| TP53    | CDKN2A  | 0.162                           | 0.035   |
| CHEK2   | ERBB2   | 0.163                           | 0.034   |
| CHEK2   | SMARCA4 | 0.163                           | 0.034   |
| HNF1A   | RET     | 0.163                           | 0.034   |
| RET     | FLT3    | 0.163                           | 0.034   |
| RET     | HNF1A   | 0.163                           | 0.034   |
| ALK     | CDKN2A  | 0.174                           | 0.024   |
| CTNNB1  | SMAD4   | 0.174                           | 0.023   |
| MET     | SMAD4   | 0.174                           | 0.023   |
| STK11   | ALK     | 0.176                           | 0.022   |
| STK11   | IDH2    | 0.176                           | 0.022   |
| CTNNB1  | RET     | 0.180                           | 0.019   |
| MET     | RET     | 0.180                           | 0.039   |
| MSH6    | ERBB2   | 0.185                           | 0.032   |
| MSH6    | RET     | 0.191                           | 0.013   |
| CHEK2   | EGFR    | 0.197                           | 0.010   |
| HNF1A   | EGFR    | 0.197                           | 0.010   |
| EGFR    | CHEK2   | 0.197                           | 0.010   |
| SMAD4   | IDH2    | 0.201                           | 0.009   |

|                |                |       |       |
|----------------|----------------|-------|-------|
| <i>RET</i>     | <i>IDH2</i>    | 0.203 | 0.008 |
| <i>SMARCA4</i> | <i>STK11</i>   | 0.212 | 0.006 |
| <i>CDK6</i>    | <i>APC</i>     | 0.221 | 0.004 |
| <i>APC</i>     | <i>CDK6</i>    | 0.221 | 0.004 |
| <i>PIK3CA</i>  | <i>SMARCA4</i> | 0.222 | 0.004 |
| <i>SMARCA4</i> | <i>PIK3CA</i>  | 0.222 | 0.040 |
| <i>PIK3CA</i>  | <i>PTEN</i>    | 0.224 | 0.003 |
| <i>PTEN</i>    | <i>KRAS</i>    | 0.233 | 0.002 |
| <i>MET</i>     | <i>MSH6</i>    | 0.235 | 0.002 |
| <i>MSH6</i>    | <i>CTNNB1</i>  | 0.235 | 0.002 |
| <i>ARID2</i>   | <i>IDH2</i>    | 0.241 | 0.002 |
| <i>STK11</i>   | <i>ARID2</i>   | 0.241 | 0.002 |
| <i>HNF1A</i>   | <i>PIK3CA</i>  | 0.248 | 0.000 |
| <i>PIK3CA</i>  | <i>MSH6</i>    | 0.249 | 0.001 |
| <i>SMARCA4</i> | <i>MSH6</i>    | 0.249 | 0.001 |
| <i>MAP2K1</i>  | <i>FLT3</i>    | 0.252 | 0.001 |
| <i>SMARCA4</i> | <i>KRAS</i>    | 0.254 | 0.000 |
| <i>CTNNB1</i>  | <i>PTEN</i>    | 0.258 | 0.001 |
| <i>CTNNB1</i>  | <i>KRAS</i>    | 0.281 | 0.000 |
| <i>HNF1A</i>   | <i>CTNNB1</i>  | 0.281 | 0.000 |
| <i>CTNNB1</i>  | <i>SMARCA4</i> | 0.305 | 0.000 |
| <i>MET</i>     | <i>CTNNB1</i>  | 0.309 | 0.000 |
| <i>PIK3CA</i>  | <i>KRAS</i>    | 0.353 | 0.000 |
| <i>PIK3CA</i>  | <i>CTNNB1</i>  | 0.390 | 0.000 |
| <i>ARID2</i>   | <i>CHEK2</i>   | 0.422 | 0.000 |

Supplementary Table S4: Cancer-specific survival and recurrence for the different types of *TP53* mutations. Crosstabulation analysis using Chi-square test with Pearson's correction, degrees of freedom=3).

a) Cancer-specific survival (CSS) in the EAC cases.

|                            |              |           | CSS            |           |       |
|----------------------------|--------------|-----------|----------------|-----------|-------|
| <i>TP53</i> mutations      |              |           | 0              | 1         | Total |
|                            | wild-type    | Count (%) | 42 (40.4)      | 17 (28.3) | 59    |
|                            | Missense     | Count (%) | 38 (36.5)      | 35 (58.3) | 73    |
|                            | LOF          | Count (%) | 21 (20.2)      | 8 (13.3)  | 29    |
|                            | missense+LOF | Count (%) | 3 (2.9%)       | 0         | 3     |
|                            | Total        |           | 104            | 60        | 164   |
| Pearson's Chi-square=8.340 |              |           | <b>P=0.039</b> |           |       |

b) Recurrence in the EAC cases

|                            |              |           | Recurrence     |           |       |
|----------------------------|--------------|-----------|----------------|-----------|-------|
| <i>TP53</i> mutations      |              |           | 0              | 1         | Total |
|                            | wild-type    | Count (%) | 37 (39.8)      | 22 (31)   | 59    |
|                            | Missense     | Count (%) | 33 (35.5)      | 40 (56.3) | 73    |
|                            | LOF          | Count (%) | 20 (21.5)      | 9 (12.7)  | 29    |
|                            | missense+LOF | Count (%) | 3 (3.2)        | 0         | 3     |
|                            | Total        |           | 93             | 71        | 164   |
| Pearson's Chi-square=8.866 |              |           | <b>P=0.031</b> |           |       |

- c) correlation between EACGSE risk classification (Lower and Higher Risks) and *TP53* mutations (df=1).

|                            |       |           | EACGSE risk |             |       |
|----------------------------|-------|-----------|-------------|-------------|-------|
| TP53 mutations             |       |           | Lower risk  | Higher risk | Total |
|                            | No    | Count (%) | 28 (47.5)   | 31 (52.5)   | 59    |
|                            | Yes   | Count (%) | 31 (52.5.5) | 74 (70.5)   | 105   |
|                            | Total |           | 59          | 105         | 164   |
| Pearson's Chi-square=5.275 |       |           | P=0.022     |             |       |

Supplementary Table S5. Cancer-specific survival, *TP53* mutations and EACGSE classification.

- a) CSS and EACGSE risk (Kaplan Meier analysis).

|                       | EACGSE risk           | Total N | N events   | Censored |              |
|-----------------------|-----------------------|---------|------------|----------|--------------|
|                       |                       |         |            | N        | %            |
| wild-type             | Lower risk            | 35      | 9          | 26       | 74.3         |
|                       | Higher risk           | 38      | 17         | 21       | 55.3         |
|                       | Overall               | 73      | 26         | 47       | 64.4         |
| Missense              | Lower risk            | 30      | 8          | 22       | 73.3         |
|                       | Higher risk           | 62      | 32         | 30       | 48.4         |
|                       | Overall               | 92      | 40         | 52       | 56.5         |
| LOF                   | Lower risk            | 11      | 3          | 8        | 72.7         |
|                       | Higher risk           | 21      | 7          | 14       | 66.7         |
|                       | Overall               | 32      | 10         | 22       | 68.8         |
| missense + LOF        | Lower risk            | 2       | 0          | 2        | 100          |
|                       | Higher risk           | 2       | 1          | 2        | 66.7         |
|                       | Overall               | 5       | 1          | 4        | 80.0         |
|                       | <b>Total</b>          | 202     | 77         | 125      | 61.9         |
|                       |                       |         |            |          |              |
|                       |                       |         | Chi-Square | DF       | P            |
| wild-type             | Log Rank (Mantel-Cox) |         | 2.062      | 1        | 0.151        |
| Missense              | Log Rank (Mantel-Cox) |         | 11.880     | 1        | <b>0.001</b> |
| LOF                   | Log Rank (Mantel-Cox) |         | 0.488      | 1        | 0.485        |
| Both missense and LOF | Log Rank (Mantel-Cox) |         | 0.500      | 1        | 0.480        |

- b) CSS, *TP53* mutations and EACGSE morphological classification (Kaplan Meier analysis).

|           | EACGSE classification | Total N | N events | Censored |      |
|-----------|-----------------------|---------|----------|----------|------|
|           |                       |         |          | N        | %    |
| wild-type | GL WD                 | 28      | 7        | 21       | 75   |
|           | GL PD                 | 22      | 9        | 13       | 59.1 |
|           | DDC                   | 4       | 1        | 3        | 75   |
|           | DAC                   | 4       | 3        | 1        | 25   |
|           | IMC                   | 5       | 1        | 4        | 80   |
|           | MMC                   | 3       | 1        | 2        | 66.7 |
|           | MIX                   | 7       | 4        | 3        | 42.9 |
|           | Overall               | 73      | 26       | 47       | 64.4 |
| Missense  | GL WD                 | 28      | 8        | 20       | 71.4 |
|           | GL PD                 | 46      | 23       | 23       | 50   |
|           | DAC                   | 3       | 1        | 2        | 66.7 |
|           | IMC                   | 6       | 3        | 3        | 50   |
|           | MMC                   | 2       | 0        | 2        | 100  |
|           | MIX                   | 7       | 5        | 2        | 28.6 |
|           | Overall               | 92      | 40       | 52       | 56.5 |
| LOF       | GL WD                 | 10      | 3        | 7        | 70   |
|           | GL PD                 | 18      | 7        | 11       | 61.1 |
|           | IMC                   | 1       | 0        | 1        | 100  |
|           | MMC                   | 1       | 0        | 1        | 100  |

|                       |                       |                   |    |           |                                |
|-----------------------|-----------------------|-------------------|----|-----------|--------------------------------|
|                       | MIX                   | 2                 | 0  | 2         | 100                            |
|                       | Overall               | 32                | 10 | 22        | 68.8                           |
| Both missense and LOF | GL WD                 | 2                 | 0  | 2         | 100                            |
|                       | GL PD                 | 3                 | 1  | 2         | 66.7                           |
|                       | Overall               | 5                 | 1  | 4         | 80.0                           |
|                       | <b>Total</b>          | 202               | 77 | 125       | 61.9                           |
|                       |                       |                   |    |           |                                |
|                       |                       | <b>Chi-Square</b> |    | <b>DF</b> | <b>P</b>                       |
| Wild-type             | Log Rank (Mantel-Cox) | 4.286             |    | 6         | 0.638                          |
| Missense              | Log Rank (Mantel-Cox) | 23.505            |    | 5         | <b>0.000 (10<sup>-3</sup>)</b> |
| LOF                   | Log Rank (Mantel-Cox) | 1.165             |    | 4         | 0.889                          |
| Both missense and LOF | Log Rank (Mantel-Cox) | 0.500             |    | 1         | 0.480                          |

### c) Correlation with age

#### Case Summaries

| Age            |     |        |       |                |         |         |
|----------------|-----|--------|-------|----------------|---------|---------|
| TP53           | N   | Median | Mean  | Std. Deviation | Minimum | Maximum |
| Missense       | 73  | 71,00  | 67,67 | 13,190         | 23      | 85      |
| LOF            | 29  | 76,00  | 73,07 | 8,892          | 50      | 85      |
| Missense + LOF | 3   | 84,00  | 80,67 | 5,774          | 74      | 84      |
| Total          | 105 | 73,00  | 69,53 | 12,323         | 23      | 85      |

Kruskal-Wallis test,  $P=0.029$ .

Supplementary Table S6: Correlations between *TP53* mutations and p53 immunostaining.

|                |              | Total N | N events | Censored |      |
|----------------|--------------|---------|----------|----------|------|
|                |              |         |          | N        | %    |
| wild-type      | Lower risk   | 35      | 9        | 26       | 74.3 |
|                | Higher risk  | 38      | 17       | 21       | 55.3 |
|                | Overall      | 73      | 26       | 47       | 64.4 |
| Missense       | Lower risk   | 30      | 8        | 22       | 73.3 |
|                | Higher risk  | 62      | 32       | 30       | 48.4 |
|                | Overall      | 92      | 40       | 52       | 56.5 |
| LOF            | Lower risk   | 11      | 3        | 8        | 72.7 |
|                | Higher risk  | 21      | 7        | 14       | 66.7 |
|                | Overall      | 32      | 10       | 22       | 68.8 |
| missense + LOF | Lower risk   | 2       | 0        | 2        | 100  |
|                | Higher risk  | 2       | 1        | 2        | 66.7 |
|                | Overall      | 5       | 1        | 4        | 80.0 |
|                | <b>Total</b> | 202     | 77       | 125      | 61.9 |

Supplementary Table S7: Spearman's correlation coefficient for *TP53* mutation types and p53 immunostaining patterns (IHC). *TP53* mutations: 0=wild-type, 1=missense, 2=LOF, p53 immunostaining: 0=normal expression, 1=overexpression, 2= null expression).

|                |                                                               |                         | <i>TP53</i> mutation<br>(0=wild-type;<br>1=missense;<br>2=LOF) | IHC for p53    |
|----------------|---------------------------------------------------------------|-------------------------|----------------------------------------------------------------|----------------|
| Spearman's rho | <i>TP53</i> mutations<br>(0=wild-type<br>1=missense<br>2=LOF) | Correlation Coefficient | 1.000                                                          | <b>0.782**</b> |
|                |                                                               | Sig. (2-tailed)         |                                                                | 0.000          |
|                |                                                               | N                       | 164                                                            | 145            |
|                | IHC for p53                                                   | Correlation Coefficient | <b>0.782</b>                                                   | 1.000          |
|                |                                                               | Sig. (2-tailed)         |                                                                | 0.000          |
|                |                                                               | N                       | 145                                                            | 145            |

\*\* Correlation is significant at the 0.01 level (2-tailed).

Supplementary Table S8: Correlation between *TP53* LOF mutations and loss of SMAD4 immunostaining. (Mann-Whitney's test; grouping variable: type of *TP53* mutations)

|                   | <i>TP53</i> mutations | N   | Mean Rank | Sum of Rank |
|-------------------|-----------------------|-----|-----------|-------------|
| <b>SMAD4 loss</b> | wild-type             | 70  | 45.57     | 3190.00     |
|                   | LOF                   | 30  | 62.00     | 1860.00     |
|                   | Total                 | 100 |           |             |

|                        | <b>SMAD4 loss</b> |
|------------------------|-------------------|
| Mann-Whitney U         | 705.000           |
| Wilcoxon W             | 3190.000          |
| Z                      | -2.661            |
| Asymp. Sig. (2-tailed) | 0.008             |

Supplementary Table S9: Cox regression analyses for CSS and clinical, genetic, pathological variables.

a) Univariate Cox regression analysis

|                         | <i>P</i> | HR    | 95% CI       |
|-------------------------|----------|-------|--------------|
| <i>TP53</i> status      | 0.733    | 1.066 | 0.737-1.543  |
| SMAD4 loss (cut-off 35) | 0.942    | 1.022 | 0.571-1.830  |
| Sex                     | 0.995    | 0.998 | 0.505-1.971  |
| Age                     | 0.028    | 1.024 | 1.003-1.046  |
| Stage                   | 0.001    | 1.950 | 1.307-2.912  |
| Lymph node ratio        | 0.000    | 11.28 | 4.626-27.513 |
| EACSGE Risk             | 0.003    | 2.512 | 1.359-4.645  |

b) Multivariate Cox regression analysis (only significant variable are shown)

|                  | <i>P</i> | HR    | 95% CI       |
|------------------|----------|-------|--------------|
| Age              | 0.005    | 1.030 | 1.009-1.052  |
| Lymph node ratio | 0.000    | 8.911 | 3.299-24.064 |
| EACSGE Risk      | 0.023    | 2.202 | 1.114-4.355  |

Supplementary Table S10: Gene fusions detected in EAC samples. Chromosomal position (in bp) of break points reported according to hg19. The gene-fusions confirmed in Sanger sequencing are indicated in bold. In two samples we detected two different gene fusions (see text for details).

| EAC ID         | Gene fusion identified | Chr_1 | Break_1   | Chr_2 | Break_2   | EACSGE classification | EACSGE subgroup | TP53 status               | Sanger confirmed |
|----------------|------------------------|-------|-----------|-------|-----------|-----------------------|-----------------|---------------------------|------------------|
| <b>EAC_197</b> | CYP2C19_CYP2C18        | 10    | 96541752  | 10    | 96493052  | GL PD                 | High grade      | p.Asp208Glu               | YES              |
|                | GIPC1_DNAJB1           | 19    | 14602467  | 19    | 14627858  |                       |                 |                           | YES              |
| <b>EAC_198</b> | IQCE_DGKB              | 7     | 2629740   | 7     | 14385016  | GL WD                 | Low grade       | p.Ala138Val               | YES              |
| <b>EAC_199</b> | PI4KA_MAPK1            | 22    | 21096516  | 22    | 22153417  | GL WD                 | Low grade       | wild-type                 | YES              |
|                | CYP2C19_CYP2C18        | 10    | 96541752  | 10    | 96493052  |                       |                 |                           | YES              |
| <b>EAC_209</b> | FRYL_PI4KA             | 4     | 48686680  | 22    | 21104293  | GL PD                 | High grade      | p.Arg273Leu - p.Gln192Ter | YES              |
| <b>EAC_210</b> | AC073283.4-EPCAM       | 2     | 47572040  | 2     | 47606092  | GL PD                 | High grade      | wild-type                 | NO               |
|                | LOC101927043-EPCAM     | 2     | 47572039  | 2     | 47606091  |                       |                 |                           | NO               |
| <b>EAC_298</b> | TPRG1_LPP              | 3     | 188850486 | 3     | 188242453 | DIFF ANAPL            |                 | p.Cys135Trp               | NO               |
